# Supplementary material for: Insulin-like Growth Factor-1 and IGF Binding Proteins Predict All-Cause Mortality and Morbidity in Older Adults
Source: MDPI journal article supplement (doi:10.3390/cells9061368), 2020-06-01
Supplement: s1 [file s1]

## Supplemental Material

**Table S1.** Baseline prevalence of age-related morbidities.

|                               | All        | Male      | Female     |
|-------------------------------|------------|-----------|------------|
| Cardiovascular disease, n (%) | 107 (12.7) | 88 (23.0) | 19 (4.1)   |
| Diabetes, n (%)               | 88 (10.5)  | 53 (13.9) | 35 (7.6)   |
| Cancer, n (%)                 | 186 (22.1) | 80 (20.9) | 106 (23.1) |
| MDCI, n (%)                   | 25 (3.0)   | 12 (3.1)  | 13 (2.8)   |

MDCI, multiple-domain cognitive impairment.

**Table S2.** Baseline Characteristics of High and Low IGF-1 Groups. All p-values are for comparisons between the low IGF-1 and high IGF-1 groups.

|                              | Combined       | Low IGF-1      | High IGF-1     | p-value |
|------------------------------|----------------|----------------|----------------|---------|
| <b>All</b>                   |                |                |                |         |
| Number of Individuals, n (%) | 761            | 369 (48.5)     | 392 (51.5)     | 0.43    |
| Age (years), mean $\pm$ SD   | 76.1 $\pm$ 6.8 | 76.6 $\pm$ 6.9 | 75.6 $\pm$ 6.7 | 0.04    |
| IGF-1 (ng/mL), mean $\pm$ SD | 117 $\pm$ 38   | 88 $\pm$ 20    | 145 $\pm$ 30   | < 0.001 |
| Deaths, n (%)                | 106 (13.9)     | 53 (14.4)      | 53 (13.5)      | 0.74    |
| <b>Males</b>                 |                |                |                |         |
| Number of Individuals, n (%) | 345            | 165 (47.8)     | 180 (52.2)     | 0.45    |
| Age (years), mean $\pm$ SD   | 76.2 $\pm$ 7.0 | 77.2 $\pm$ 7.0 | 75.4 $\pm$ 6.9 | 0.02    |
| IGF-1 (ng/mL), mean $\pm$ SD | 127 $\pm$ 39   | 96 $\pm$ 19    | 156 $\pm$ 29   | < 0.001 |
| Deaths, n (%)                | 57 (16.5)      | 32 (19.4)      | 25 (13.9)      | 0.17    |
| <b>Females</b>               |                |                |                |         |
| Number of Individuals, n (%) | 416            | 204 (49.0)     | 212 (51.0)     | 0.73    |
| Age (years), mean $\pm$ SD   | 76.0 $\pm$ 6.7 | 76.2 $\pm$ 6.8 | 75.8 $\pm$ 6.5 | 0.57    |
| IGF-1 (ng/mL), mean $\pm$ SD | 108 $\pm$ 36   | 80.5 $\pm$ 19  | 135 $\pm$ 28   | < 0.001 |
| Deaths, n (%)                | 49 (11.8)      | 21 (10.3)      | 28 (13.2)      | 0.36    |

**IGF-Associated Proteins and Mortality Hazard, Age-Stratified**

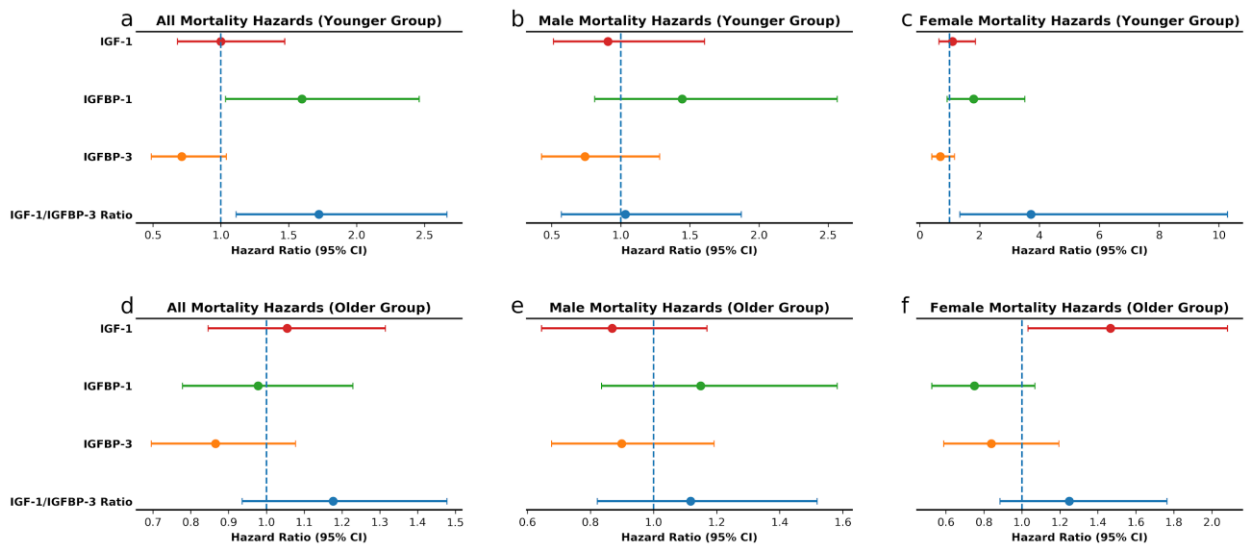

**Figure S1.** IGF-Associated Proteins and Mortality Hazard, Age-Stratified. Incident mortality hazards for combined cohort, adjusted for age and sex (a), males, adjusted for age (b), and females, adjusted for age (c) in individuals younger than age 75.51 years at baseline (Younger group). Incident

mortality hazard for combined cohort, adjusted for age and sex (**d**), males, adjusted for age (**e**), and females, adjusted for age (**f**) in individuals older than 75.51 years at baseline (Older group). All analyses are for high levels of IGF-associated proteins as compared to individuals with low levels (biochemical measurements dichotomized by sex-specific medians).

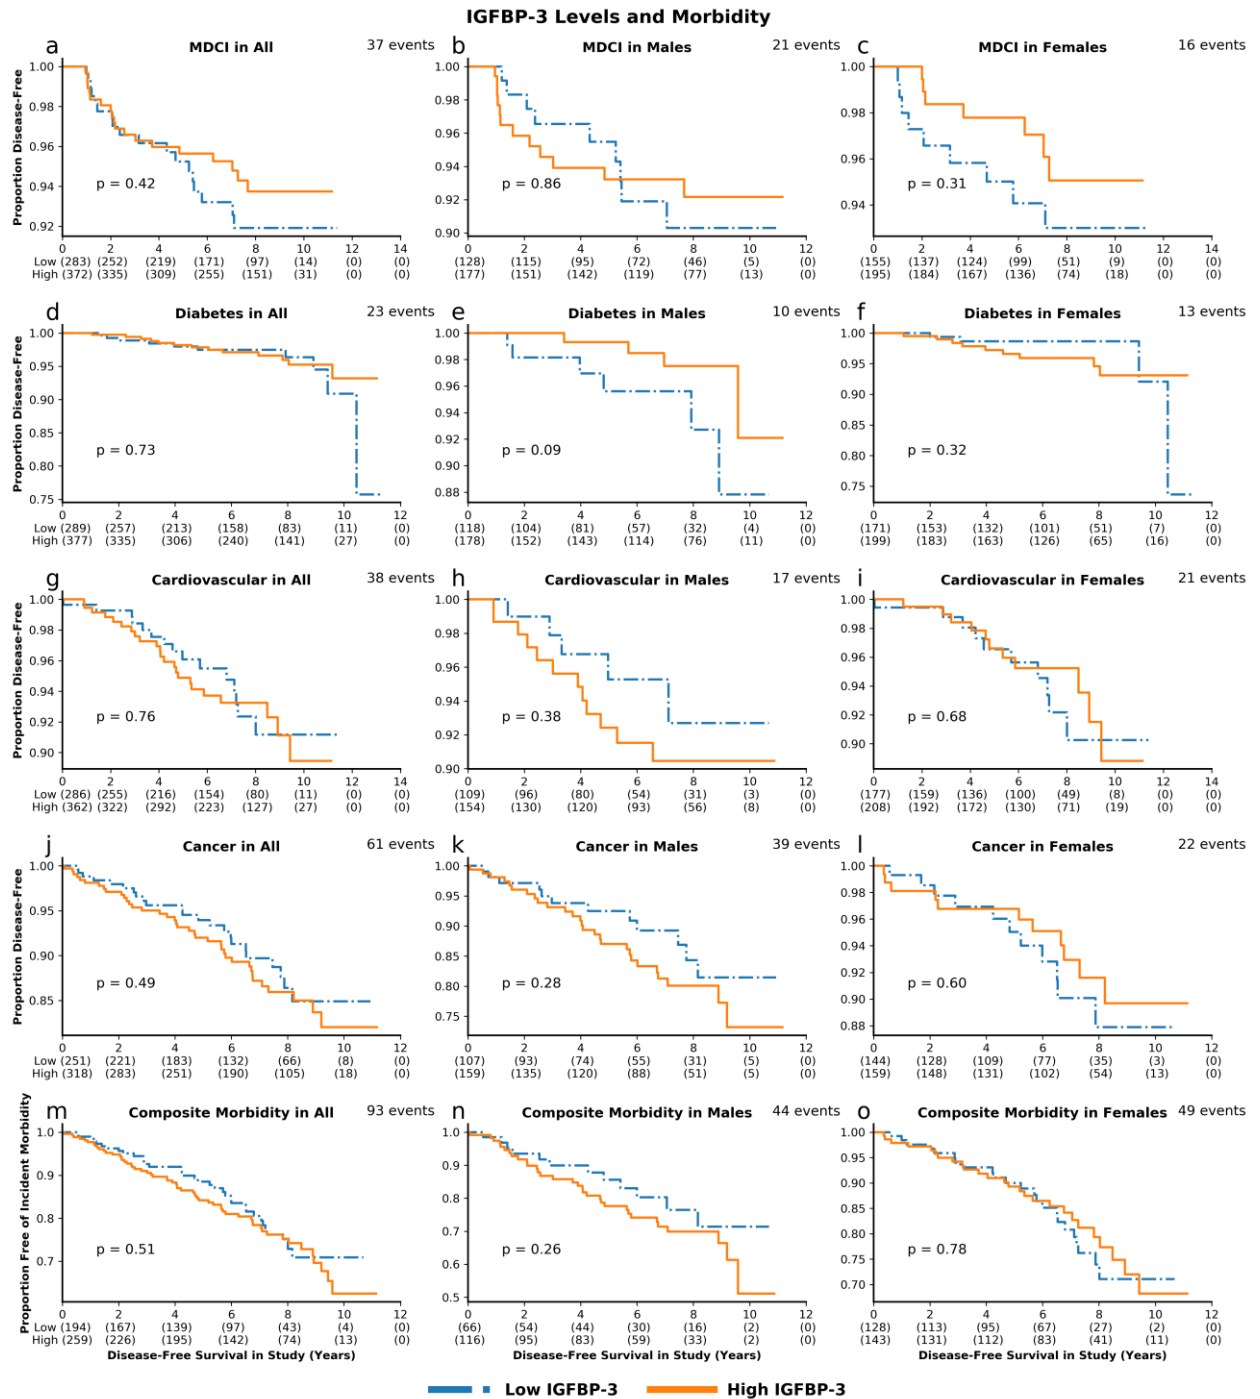

**Figure S2.** IGFBP-3 Levels and Morbidity. Unadjusted survival curves for MDCI (**a**. combined cohort; **b**. males; **c**. females), diabetes (**d–f**), cardiovascular disease (**g–i**), cancer (**j–l**), and composite incident morbidity (**m–o**) in individuals with high and low levels of IGFBP-3.

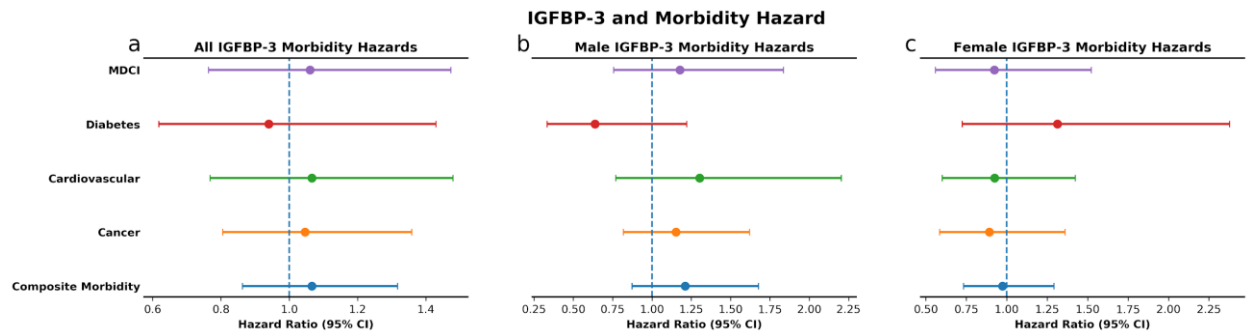

**Figure S3.** IGFBP-3 and Morbidity Hazard. Sex and age-adjusted incident morbidity hazards for all individuals (a) and age-adjusted survival hazard for males (b) and females (c) with high levels of IGFBP-3 as compared to individuals with low levels.

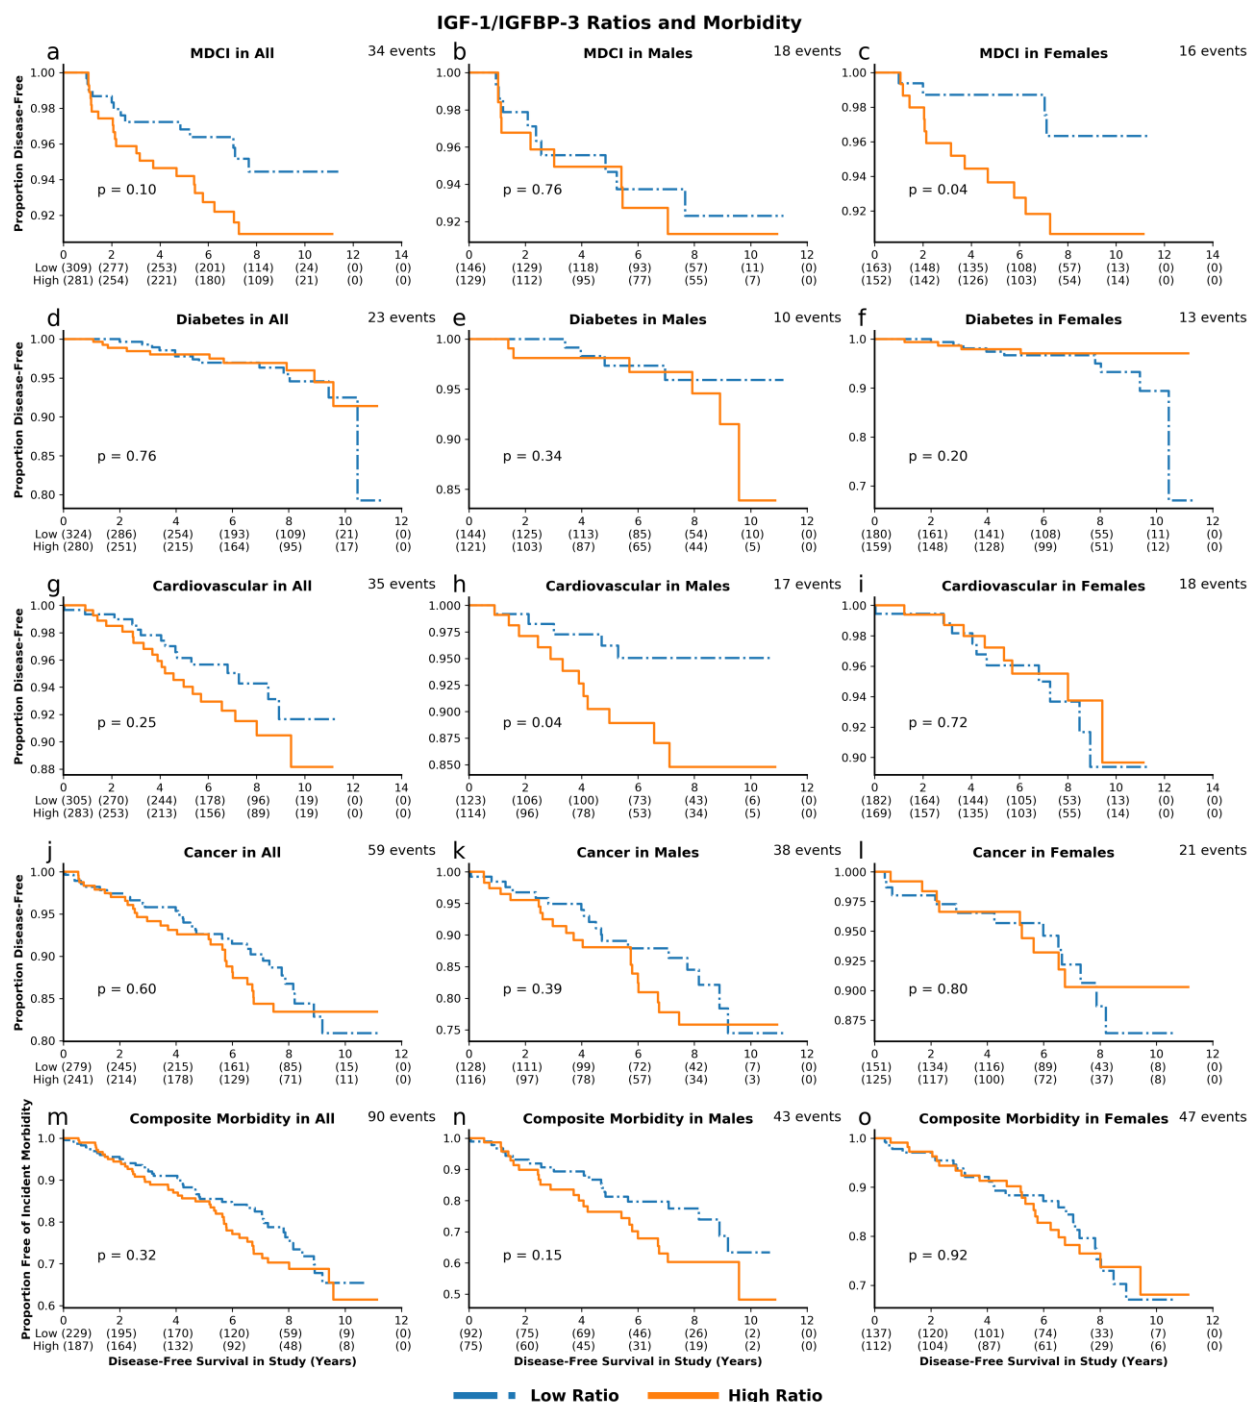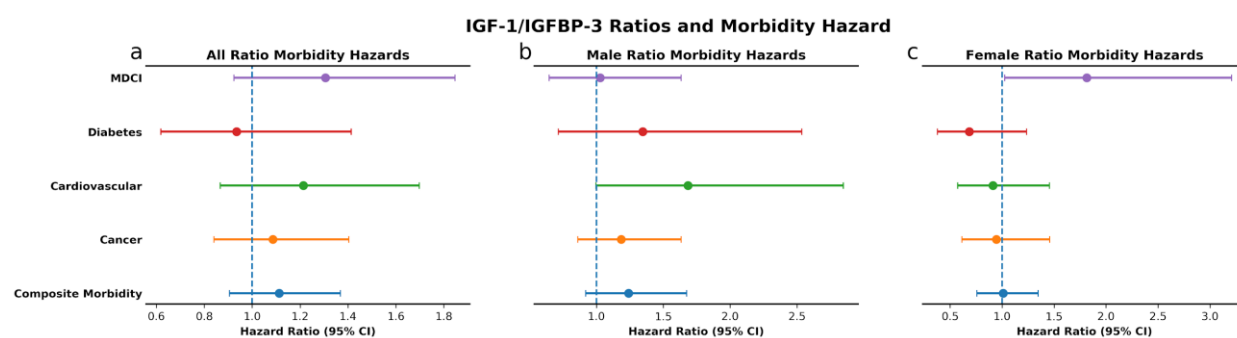

**Figure S5.** IGF-1/IGFBP-3 Molar Ratios and Morbidity Hazard. Sex and age-adjusted incident morbidity hazards for all individuals (**a**) and age-adjusted survival hazard for males (**b**) and females (**c**) with high molar ratios of IGF-1/IGFBP-3 as compared to individuals with low molar ratios.
